# Supplementary material for: Halide-driven polarity tuning and optimized SHG-bandgap balance in (C4H11N2)ZnX3 (X = Cl, Br, I)
Source: Royal Society of Chemistry journal article supplement (doi:10.1039/d4qi01515k), 2024-01-01
Supplement: d4qi01515k1.pdf [file d4qi01515k1.pdf]

**Halide-Driven Polarity Tuning and Optimized SHG-Bandgap Balance in  
(C<sub>4</sub>H<sub>11</sub>N<sub>2</sub>)ZnX<sub>3</sub> (X = Cl, Br, I)**

Jin Chen<sup>a,b\*</sup>, Huai-Yu Wu<sup>a</sup>, Miao-Bin Xu<sup>a</sup>, Ming-Chang Wang<sup>a</sup>, Qian-Qian Chen<sup>a</sup>,  
Bing-Xuan Li<sup>b</sup>, Chun-Li Hu<sup>b\*</sup>, and Ke-Zhao Du<sup>a,b\*</sup>

a: College of Chemistry and Materials Science, Fujian Key Laboratory of Polymer  
Materials, Fujian Normal University, Fuzhou 350007, China.

b: State Key Laboratory of Structural Chemistry, Fujian Institute of Research on the  
Structure of Matter, Chinese Academy of Sciences, Fuzhou, 350002, P. R. China.

**Table S1.** Summary of Crystal Data and Structure Refinements for title compounds

| Empirical formula                                                                   | C <sub>4</sub> H <sub>11</sub> Cl <sub>3</sub> N <sub>2</sub> Z | C <sub>4</sub> H <sub>11</sub> Br <sub>3</sub> N <sub>2</sub> Zn | C <sub>4</sub> H <sub>10</sub> I <sub>3</sub> N <sub>2</sub> Zn |
|-------------------------------------------------------------------------------------|-----------------------------------------------------------------|------------------------------------------------------------------|-----------------------------------------------------------------|
|                                                                                     | n                                                               |                                                                  |                                                                 |
| Formula weight                                                                      | 258.87                                                          | 392.25                                                           | 532.21                                                          |
| Temperature/K                                                                       | 100(2)                                                          | 293(2)                                                           | 298.81(10)                                                      |
| Crystal system                                                                      | Triclinic                                                       | Triclinic                                                        | Monoclinic                                                      |
| Space group                                                                         | <i>P</i> 1                                                      | <i>P</i> 1                                                       | <i>C</i> c                                                      |
| <i>a</i> /Å                                                                         | 6.4270(2)                                                       | 6.5788(4)                                                        | 24.3787(5)                                                      |
| <i>b</i> /Å                                                                         | 6.4344(2)                                                       | 6.6986(4)                                                        | 7.0895(2)                                                       |
| <i>c</i> /Å                                                                         | 6.6193(2)                                                       | 6.8678(3)                                                        | 13.6140(3)                                                      |
| <i>α</i> /°                                                                         | 104.564(3)                                                      | 105.815(4)                                                       | 90                                                              |
| <i>β</i> /°                                                                         | 92.820(3)                                                       | 93.252(4)                                                        | 91.304(2)                                                       |
| <i>γ</i> /°                                                                         | 118.055(4)                                                      | 116.169(6)                                                       | 90                                                              |
| Volume/Å <sup>3</sup>                                                               | 229.271(16)                                                     | 255.81(3)                                                        | 2352.34(10)                                                     |
| <i>Z</i>                                                                            | 1                                                               | 1                                                                | 8                                                               |
| $\rho_{\text{calc}}/\text{cm}^3$                                                    | 1.875                                                           | 2.546                                                            | 3.006                                                           |
| $\mu/\text{mm}^{-1}$                                                                | 11.219                                                          | 16.576                                                           | 64.311                                                          |
| F(000)                                                                              | 130.0                                                           | 184.0                                                            | 1896                                                            |
| Radiation                                                                           | Cu K $\alpha$ ( $\lambda=1.54184$ )                             | Cu K $\alpha$ ( $\lambda=1.54184$ )                              | Cu K $\alpha$ ( $\lambda=1.54184$ )                             |
| Goodness-of-fit on F <sup>2</sup>                                                   | 1.057                                                           | 1.059                                                            | 1.041                                                           |
| Flack factor                                                                        | 0.00(4)                                                         | -0.06(9)                                                         | 0.065(14)                                                       |
| R <sub>1</sub> , wR <sub>2</sub> [ <i>I</i> > 2 $\sigma$ ( <i>I</i> )] <sup>a</sup> | 0.0582, 0.1416                                                  | 0.0657, 0.1618                                                   | 0.0580, 0.1460                                                  |
| R <sub>1</sub> , wR <sub>2</sub> (all data) <sup>a</sup>                            | 0.0583, 0.1417                                                  | 0.0659, 0.1623                                                   | 0.0590, 0.1472                                                  |

<sup>a</sup>R<sub>1</sub> =  $\sum||F_o| - |F_c||/\sum|F_o|$ , and wR<sub>2</sub> =  $\{\sum w[(F_o)^2 - (F_c)^2]^2/\sum w[(F_o)^2]^2\}^{1/2}$ .

**Table S2.** Fractional Atomic Coordinates ( $\times 10^4$ ) and Equivalent Isotropic Displacement Parameters ( $\text{\AA}^2 \times 10^3$ ) for  $(\text{C}_4\text{H}_{11}\text{N}_2)\text{ZnX}_3$  ( $\text{X} = \text{Cl}, \text{Br}, \text{I}$ ).

| <b><math>(\text{C}_4\text{H}_{11}\text{N}_2)\text{ZnCl}_3</math></b> |            |             |            |              |
|----------------------------------------------------------------------|------------|-------------|------------|--------------|
| <b>Atom</b>                                                          | <b>x</b>   | <b>y</b>    | <b>z</b>   | <b>U(eq)</b> |
| Zn1                                                                  | 4694.9(12) | 5998.7(12)  | 6769.4(11) | 8.7(4)       |
| Cl1                                                                  | 4551(3)    | 8796(3)     | 5367(3)    | 12.5(4)      |
| Cl2                                                                  | 1214(3)    | 3422(4)     | 7470(3)    | 18.8(5)      |
| Cl3                                                                  | 7777(3)    | 7865(3)     | 9613(3)    | 13.0(5)      |
| N1                                                                   | 6939(12)   | 2793(12)    | 375(11)    | 10.6(13)     |
| N2                                                                   | 5648(12)   | 3976(12)    | 4477(12)   | 10.4(13)     |
| C1                                                                   | 4450(14)   | 1200(14)    | 703(13)    | 14.4(16)     |
| C2                                                                   | 3857(14)   | 2764(15)    | 2448(13)   | 12.9(15)     |
| C3                                                                   | 8109(14)   | 5521(14)    | 4111(13)   | 11.2(15)     |
| C4                                                                   | 8773(15)   | 3993(17)    | 2404(14)   | 14.7(16)     |
| <b><math>(\text{C}_4\text{H}_{11}\text{N}_2)\text{ZnBr}_3</math></b> |            |             |            |              |
| <b>Atom</b>                                                          | <b>x</b>   | <b>y</b>    | <b>z</b>   | <b>U(eq)</b> |
| Br1                                                                  | 5501.7(19) | 1272.9(17)  | 4716.4(16) | 44.1(4)      |
| Br2                                                                  | 2022.7(19) | 2163.1(19)  | 414.9(16)  | 45.1(4)      |
| Br3                                                                  | 8684(3)    | 6679(3)     | 2631(3)    | 60.5(5)      |
| Zn1                                                                  | 5209(3)    | 4062(3)     | 3325(2)    | 34.8(4)      |
| N1                                                                   | 4271(16)   | 6050(17)    | 5609(14)   | 31.7(17)     |
| N2                                                                   | 3149(19)   | 7300(20)    | 9609(15)   | 42(2)        |
| C1                                                                   | 5470(20)   | 8780(20)    | 9250(20)   | 40(2)        |
| C2                                                                   | 6050(20)   | 7270(20)    | 7551(18)   | 42(3)        |
| C3                                                                   | 1320(20)   | 6140(30)    | 7680(20)   | 52(3)        |
| C4                                                                   | 1962(19)   | 4650(30)    | 6015(18)   | 40(2)        |
| <b><math>(\text{C}_4\text{H}_{11}\text{N}_2)\text{ZnI}_3</math></b>  |            |             |            |              |
| <b>Atom</b>                                                          | <b>x</b>   | <b>y</b>    | <b>z</b>   | <b>U(eq)</b> |
| I1                                                                   | 6292.3(4)  | 8487.2(14)  | 8062.2(6)  | 48.0(3)      |
| I2                                                                   | 7116.8(4)  | 12263.0(19) | 6077.9(8)  | 61.0(3)      |
| I3                                                                   | 5408.2(4)  | 13177.1(14) | 6674.9(7)  | 50.0(3)      |
| I4                                                                   | 3827.5(4)  | 6476.9(13)  | 5576.9(6)  | 48.1(3)      |
| I5                                                                   | 4568.9(4)  | 2418.0(15)  | 3602.8(7)  | 52.9(3)      |
| I6                                                                   | 2880.7(4)  | 1818.7(14)  | 4259.8(7)  | 48.2(3)      |
| Zn1                                                                  | 6206.9(8)  | 10761(2)    | 6578.2(13) | 40.1(4)      |
| Zn2                                                                  | 3693.9(8)  | 4177(2)     | 4108.4(13) | 39.8(4)      |
| N1                                                                   | 6003(5)    | 9028(15)    | 5399(8)    | 38(2)        |
| N2                                                                   | 5681(5)    | 5602(18)    | 4374(9)    | 48(3)        |
| N3                                                                   | 3482(4)    | 5920(15)    | 2929(8)    | 37(2)        |
| N4                                                                   | 3185(6)    | 9431(18)    | 1966(11)   | 51(3)        |
| C1                                                                   | 3881(6)    | 7390(30)    | 2787(12)   | 49(3)        |
| C2                                                                   | 2930(7)    | 6720(20)    | 2985(13)   | 50(3)        |
| C3                                                                   | 2771(7)    | 7880(30)    | 2089(17)   | 64(5)        |
| C4                                                                   | 3750(6)    | 8630(20)    | 1901(12)   | 47(3)        |

|    |         |          |          |       |
|----|---------|----------|----------|-------|
| C5 | 5441(6) | 8350(20) | 5375(11) | 47(3) |
| C6 | 6373(7) | 7410(30) | 5292(12) | 49(3) |
| C7 | 6273(6) | 6310(30) | 4374(11) | 49(3) |
| C8 | 5287(6) | 7220(30) | 4453(13) | 52(4) |

**Table S3.** Bond Lengths for  $(C_4H_{11}N_2)ZnX_3$  (X = Cl, Br, I).

| <b><math>(C_4H_{11}N_2)ZnCl_3</math></b> |             |                 |             |             |                 |
|------------------------------------------|-------------|-----------------|-------------|-------------|-----------------|
| <b>Atom</b>                              | <b>Atom</b> | <b>Length/Å</b> | <b>Atom</b> | <b>Atom</b> | <b>Length/Å</b> |
| Zn1                                      | Cl1         | 2.2582(19)      | N1          | C4          | 1.502(12)       |
| Zn1                                      | Cl2         | 2.2291(19)      | N2          | C2          | 1.488(11)       |
| Zn1                                      | Cl3         | 2.2735(19)      | N2          | C3          | 1.493(9)        |
| Zn1                                      | N2          | 2.055(6)        | C1          | C2          | 1.521(11)       |
| N1                                       | C1          | 1.503(10)       | C3          | C4          | 1.519(10)       |
| <b><math>(C_4H_{11}N_2)ZnBr_3</math></b> |             |                 |             |             |                 |
| <b>Atom</b>                              | <b>Atom</b> | <b>Length/Å</b> | <b>Atom</b> | <b>Atom</b> | <b>Length/Å</b> |
| Br1                                      | Zn1         | 2.3896(19)      | N1          | C4          | 1.483(15)       |
| Br2                                      | Zn1         | 2.4068(18)      | N2          | C1          | 1.489(16)       |
| Br3                                      | Zn1         | 2.360(2)        | N2          | C3          | 1.499(18)       |
| Zn1                                      | N1          | 2.076(9)        | C1          | C2          | 1.509(17)       |
| N1                                       | C2          | 1.483(14)       | C3          | C4          | 1.513(18)       |
| <b><math>(C_4H_{11}N_2)ZnI_3</math></b>  |             |                 |             |             |                 |
| <b>Atom</b>                              | <b>Atom</b> | <b>Length/Å</b> | <b>Atom</b> | <b>Atom</b> | <b>Length/Å</b> |
| I1                                       | Zn1         | 2.590(2)        | N2          | C7          | 1.529(19)       |
| I2                                       | Zn1         | 2.568(2)        | N2          | C8          | 1.50(2)         |
| I3                                       | Zn1         | 2.600(2)        | N3          | C1          | 1.446(19)       |
| I4                                       | Zn2         | 2.596(2)        | N3          | C2          | 1.465(19)       |
| I5                                       | Zn2         | 2.580(2)        | N4          | C3          | 1.50(3)         |
| I6                                       | Zn2         | 2.6067(19)      | N4          | C4          | 1.496(19)       |
| Zn1                                      | N1          | 2.074(11)       | C1          | C4          | 1.52(2)         |
| Zn2                                      | N3          | 2.083(11)       | C2          | C3          | 1.51(2)         |
| N1                                       | C5          | 1.450(18)       | C5          | C8          | 1.530(19)       |
| N1                                       | C6          | 1.47(2)         | C6          | C7          | 1.49(2)         |

**Table S4.** Bond Angles for  $(C_4H_{11}N_2)ZnX_3$  (X = Cl, Br, I).

| <b><math>(C_4H_{11}N_2)ZnCl_3</math></b> |             |             |                |             |             |             |                |
|------------------------------------------|-------------|-------------|----------------|-------------|-------------|-------------|----------------|
| <b>Atom</b>                              | <b>Atom</b> | <b>Atom</b> | <b>Angle/°</b> | <b>Atom</b> | <b>Atom</b> | <b>Atom</b> | <b>Angle/°</b> |
| Cl1                                      | Zn1         | Cl3         | 111.31(7)      | C2          | N2          | Zn1         | 110.8(5)       |
| Cl2                                      | Zn1         | Cl1         | 114.44(8)      | C2          | N2          | C3          | 110.4(6)       |
| Cl2                                      | Zn1         | Cl3         | 112.46(8)      | C3          | N2          | Zn1         | 112.0(5)       |
| N2                                       | Zn1         | Cl1         | 104.5(2)       | N1          | C1          | C2          | 108.9(6)       |
| N2                                       | Zn1         | Cl2         | 108.7(2)       | N2          | C2          | C1          | 113.0(7)       |
| N2                                       | Zn1         | Cl3         | 104.6(2)       | N2          | C3          | C4          | 111.1(6)       |
| C4                                       | N1          | C1          | 111.8(7)       | N1          | C4          | C3          | 110.4(6)       |

| <b>(C<sub>4</sub>H<sub>11</sub>N<sub>2</sub>)ZnBr<sub>3</sub></b> |             |             |                |             |             |             |                |
|-------------------------------------------------------------------|-------------|-------------|----------------|-------------|-------------|-------------|----------------|
| <b>Atom</b>                                                       | <b>Atom</b> | <b>Atom</b> | <b>Angle/°</b> | <b>Atom</b> | <b>Atom</b> | <b>Atom</b> | <b>Angle/°</b> |
| Br1                                                               | Zn1         | Br2         | 111.50(8)      | C2          | N1          | C4          | 110.3(9)       |
| Br3                                                               | Zn1         | Br1         | 114.89(10)     | C4          | N1          | Zn1         | 113.0(7)       |
| Br3                                                               | Zn1         | Br2         | 112.51(9)      | C1          | N2          | C3          | 111.9(10)      |
| N1                                                                | Zn1         | Br1         | 104.7(3)       | N2          | C1          | C2          | 109.1(10)      |
| N1                                                                | Zn1         | Br2         | 104.7(3)       | N1          | C2          | C1          | 113.1(11)      |
| N1                                                                | Zn1         | Br3         | 107.6(3)       | N2          | C3          | C4          | 109.2(11)      |
| C2                                                                | N1          | Zn1         | 111.0(7)       | N1          | C4          | C3          | 112.0(11)      |
| <b>(C<sub>4</sub>H<sub>11</sub>N<sub>2</sub>)ZnI<sub>3</sub></b>  |             |             |                |             |             |             |                |
| <b>Atom</b>                                                       | <b>Atom</b> | <b>Atom</b> | <b>Angle/°</b> | <b>Atom</b> | <b>Atom</b> | <b>Atom</b> | <b>Angle/°</b> |
| I1                                                                | Zn1         | I3          | 114.68(7)      | C6          | N1          | Zn1         | 113.8(9)       |
| I2                                                                | Zn1         | I1          | 114.29(8)      | C8          | N2          | C7          | 110.7(12)      |
| I2                                                                | Zn1         | I3          | 113.14(8)      | C1          | N3          | Zn2         | 112.1(9)       |
| N1                                                                | Zn1         | I1          | 104.4(3)       | C1          | N3          | C2          | 110.4(11)      |
| N1                                                                | Zn1         | I2          | 103.5(3)       | C2          | N3          | Zn2         | 113.8(8)       |
| N1                                                                | Zn1         | I3          | 105.3(3)       | C4          | N4          | C3          | 110.4(12)      |
| I4                                                                | Zn2         | I6          | 115.12(7)      | N3          | C1          | C4          | 113.1(13)      |
| I5                                                                | Zn2         | I4          | 114.85(8)      | N3          | C2          | C3          | 112.8(13)      |
| I5                                                                | Zn2         | I6          | 110.27(7)      | N4          | C3          | C2          | 109.1(15)      |
| N3                                                                | Zn2         | I4          | 104.2(3)       | N4          | C4          | C1          | 110.5(12)      |
| N3                                                                | Zn2         | I5          | 105.9(3)       | N1          | C5          | C8          | 114.0(12)      |
| N3                                                                | Zn2         | I6          | 105.5(3)       | N1          | C6          | C7          | 113.8(13)      |
| C5                                                                | N1          | Zn1         | 115.0(8)       | C6          | C7          | N2          | 107.9(12)      |
| C5                                                                | N1          | C6          | 108.7(11)      | N2          | C8          | C5          | 108.3(13)      |

**Table S5.** Hydrogen Bonds for (H<sub>11</sub>C<sub>4</sub>N<sub>2</sub>)ZnX<sub>3</sub> (X = Cl, Br, I)

| <b>(C<sub>4</sub>H<sub>11</sub>N<sub>2</sub>)ZnCl<sub>3</sub></b> |          |                  |                 |                 |                 |                |
|-------------------------------------------------------------------|----------|------------------|-----------------|-----------------|-----------------|----------------|
| <b>D</b>                                                          | <b>H</b> | <b>A</b>         | <b>d(D-H)/Å</b> | <b>d(H-A)/Å</b> | <b>d(D-A)/Å</b> | <b>D-H-A/°</b> |
| N1                                                                | H1B      | Cl3 <sup>1</sup> | 0.91            | 2.35            | 3.224(7)        | 161.9          |
| N2                                                                | H2       | Cl1 <sup>2</sup> | 1.00            | 2.32            | 3.282(7)        | 161.9          |
| <b>(C<sub>4</sub>H<sub>11</sub>N<sub>2</sub>)ZnBr<sub>3</sub></b> |          |                  |                 |                 |                 |                |
| <b>D</b>                                                          | <b>H</b> | <b>A</b>         | <b>d(D-H)/Å</b> | <b>d(H-A)/Å</b> | <b>d(D-A)/Å</b> | <b>D-H-A/°</b> |
| N1                                                                | H1       | Br1 <sup>3</sup> | 0.98            | 2.53            | 3.464(10)       | 158.6          |
| N2                                                                | H2B      | Br2 <sup>4</sup> | 0.89            | 2.55            | 3.398(12)       | 159.6          |
| <b>(C<sub>4</sub>H<sub>11</sub>N<sub>2</sub>)ZnI<sub>3</sub></b>  |          |                  |                 |                 |                 |                |
| <b>D</b>                                                          | <b>H</b> | <b>A</b>         | <b>d(D-H)/Å</b> | <b>d(H-A)/Å</b> | <b>d(D-A)/Å</b> | <b>D-H-A/°</b> |
| N1                                                                | H1       | I1 <sup>5</sup>  | 0.98            | 2.75            | 3.720(11)       | 170            |
| N2                                                                | H2B      | I3 <sup>6</sup>  | 0.89            | 2.78            | 3.649(12)       | 166            |
| N3                                                                | H3       | I4 <sup>7</sup>  | 0.98            | 2.80            | 3.740(11)       | 160            |
| N4                                                                | H4B      | I6 <sup>8</sup>  | 0.89            | 2.79            | 3.645(15)       | 161            |

<sup>1</sup>+X, +Y, -1+Z; <sup>2</sup>+X, -1+Y, +Z; <sup>3</sup>+X, 1+Y, +Z; <sup>4</sup>+X, +Y, 1+Z; <sup>5</sup>+x, 2-y, -1/2+z; <sup>6</sup>+x, -1+y, z; <sup>7</sup>+x, 1-y, -1/2+z; <sup>8</sup>+x, 1+y, z.

**Table S6.** The assignments of the absorption peaks for  $(\text{H}_{11}\text{C}_4\text{N}_2)\text{ZnX}_3$  ( $\text{X} = \text{Cl}, \text{Br}, \text{I}$ ).

| Assignment ( $\text{cm}^{-1}$ ) | $(\text{C}_4\text{H}_{11}\text{N}_2)\text{ZnCl}_3$ | $(\text{C}_4\text{H}_{11}\text{N}_2)\text{ZnBr}_3$ | $(\text{C}_4\text{H}_{11}\text{N}_2)\text{ZnI}_3$ |
|---------------------------------|----------------------------------------------------|----------------------------------------------------|---------------------------------------------------|
| $\nu(\text{N-H})$               | 3212, 3170                                         | 3205, 3159                                         | 3168, 3141                                        |
| $\nu(\text{C-H})$               | 3035, 2785,<br>2785, 2364                          | 3046, 2774<br>2424, 2365                           | 3036, 2764<br>2358                                |
| $\nu(\text{C-N})$               | 1572                                               | 1566                                               | 1557                                              |
| $\nu(\text{C-C})$               | 1450, 1400                                         | 1450, 1400                                         | 1447, 1395                                        |
| $\nu(\text{Zn-N})$              | 1293, 1216,<br>871                                 | 1292, 1200<br>1080, 856                            | 1292, 1200,<br>1083, 858                          |
| $\nu(\text{Zn-X})$              | 626, 484                                           | 625, 480                                           | 621, 474                                          |

**Table S7.** Calculated dipole moment for  $\text{ZnNCl}_3$ ,  $\text{ZnNBr}_3$ ,  $\text{ZnNI}_3$  and net dipole moment for a unit cell in  $(\text{C}_4\text{H}_{11}\text{N}_2)\text{ZnCl}_3$ ,  $(\text{C}_4\text{H}_{11}\text{N}_2)\text{ZnBr}_3$  and  $(\text{C}_4\text{H}_{11}\text{N}_2)\text{ZnI}_3$ .

| $(\text{C}_4\text{H}_{11}\text{N}_2)\text{ZnCl}_3$ ( $Z = 1$ ) |                                       |             |             |                 |
|----------------------------------------------------------------|---------------------------------------|-------------|-------------|-----------------|
| Polar unit                                                     | Dipole moment ( $D = \text{Debyes}$ ) |             |             | Total magnitude |
|                                                                | x-component                           | y-component | z-component |                 |
| $\text{Zn}(1)\text{NCl}_3$                                     | -0.87314                              | 1.078438    | 1.529       | 2.064761        |
| Net dipole moment (a unit cell)                                | -0.87314                              | 1.078438    | 1.529       | 2.064761        |
| Dipole moment per unit volume ( $\text{Debyes}/\text{\AA}^3$ ) | 0.009                                 |             |             |                 |
| $(\text{C}_4\text{H}_{11}\text{N}_2)\text{ZnBr}_3$ ( $Z = 1$ ) |                                       |             |             |                 |
| Polar unit                                                     | Dipole moment ( $D = \text{Debyes}$ ) |             |             | Total magnitude |
|                                                                | x-component                           | y-component | z-component |                 |
| $\text{Zn}(1)\text{NBr}_3$                                     | 2.557298                              | -2.15943    | -3.86643    | 5.113925        |
| Net dipole moment (a unit cell)                                | 2.557298                              | -2.15943    | -3.86643    | 5.113925        |
| Dipole moment per unit volume ( $\text{Debyes}/\text{\AA}^3$ ) | 0.020                                 |             |             |                 |
| $(\text{C}_4\text{H}_{11}\text{N}_2)\text{ZnI}_3$ ( $Z = 8$ )  |                                       |             |             |                 |
| Polar unit                                                     | Dipole moment ( $D = \text{Debyes}$ ) |             |             | Total magnitude |
|                                                                | x-component                           | y-component | z-component |                 |
| $\text{Zn}(1)\text{NI}_3$                                      | -1.74977                              | -4.12558    | -4.9699     | 6.691941        |
| $\text{Zn}(2)\text{NI}_3$                                      | -1.74985                              | 4.125606    | -4.96989    | 6.691966        |
| $\text{Zn}(3)\text{NI}_3$                                      | -1.7533                               | 4.123178    | -4.96882    | 6.690582        |
| $\text{Zn}(4)\text{NI}_3$                                      | -1.75347                              | -4.12615    | -4.9701     | 6.693403        |

|                                                         |          |          |          |          |
|---------------------------------------------------------|----------|----------|----------|----------|
| Zn(5)NI <sub>3</sub>                                    | -1.61051 | 4.887684 | -5.18566 | 7.305772 |
| Zn(6)NI <sub>3</sub>                                    | -1.60722 | -4.8901  | -5.18685 | 7.307508 |
| Zn(7)NI <sub>3</sub>                                    | -1.6094  | 4.888934 | -5.18538 | 7.306159 |
| Zn(8)NI <sub>3</sub>                                    | -1.61066 | -4.89074 | -5.18696 | 7.308775 |
| Net dipole moment (a unit cell)                         | -13.4442 | 0        | -40.6236 | 42.79043 |
| Dipole moment per unit volume (Debyes/ Å <sup>3</sup> ) | 0.018    |          |          |          |

**Table S8.** The angles between the crystallography axes (i.e. *a*, *b* and *c*) and the principal dielectric axes (i.e. *x*, *y* and *z*) in triclinic Cl and Br compounds.

| Angle | <i>a</i> -O- <i>x</i> | <i>b</i> -O- <i>x</i> | <i>c</i> -O- <i>x</i> | <i>a</i> -O- <i>y</i> | <i>b</i> -O- <i>y</i> | <i>c</i> -O- <i>y</i> | <i>a</i> -O- <i>z</i> | <i>b</i> -O- <i>z</i> | <i>c</i> -O- <i>z</i> |
|-------|-----------------------|-----------------------|-----------------------|-----------------------|-----------------------|-----------------------|-----------------------|-----------------------|-----------------------|
| Cl    | 62.06                 | 58.58                 | 122.887               | 138.383               | 33.962                | 76.503                | 61.920                | 101.583               | 36.229                |
| Br    | 66.429                | 50.786                | 118.697               | 134.269               | 46.881                | 63.387                | 53.558                | 111.397               | 41.047                |

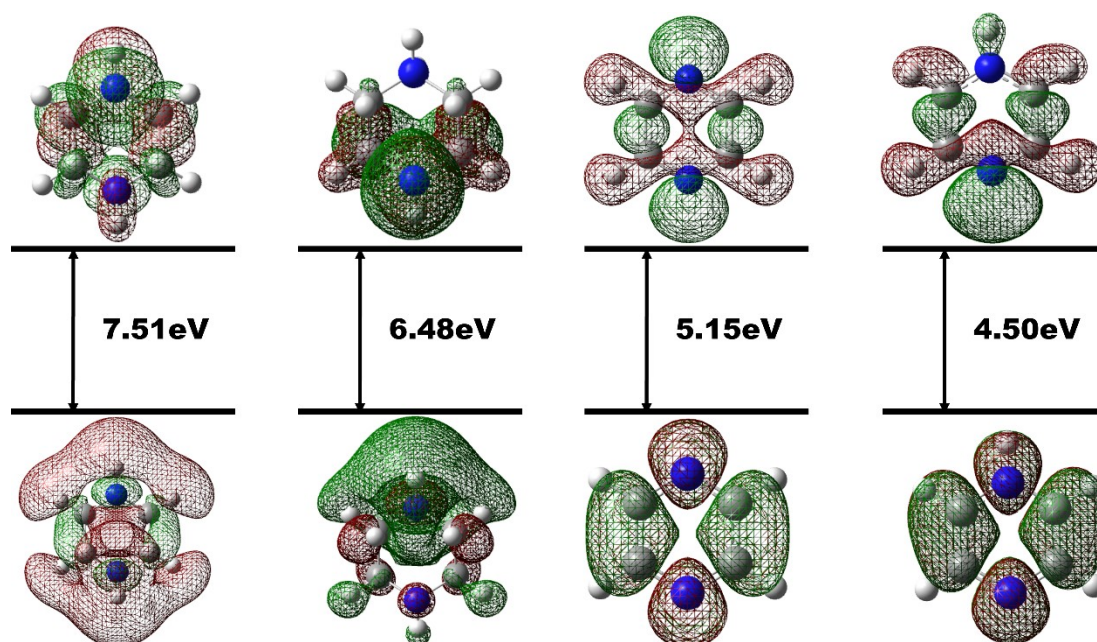

**Figure S1.** Calculated HOMO-LUMO gaps of non- $\pi$ -conjugated  $C_4H_{10}N_2$  and  $(C_4H_{11}N_2)^+$  as well as  $\pi$ -conjugated  $C_4H_4N_2$  and  $(C_4H_5N_2)^+$ .

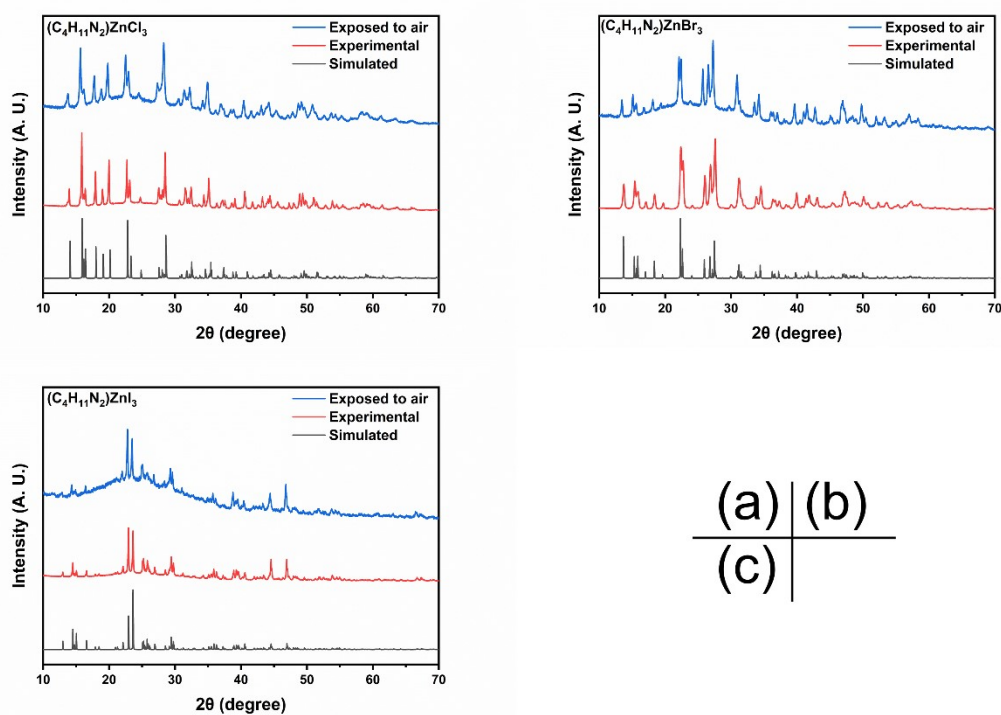

**Figure S2.** Simulated, measured and exposed to air powder X-ray diffraction patterns for  $(C_4H_{11}N_2)ZnX_3$  ( $X = Cl$  a,  $Br$  b,  $I$  c).



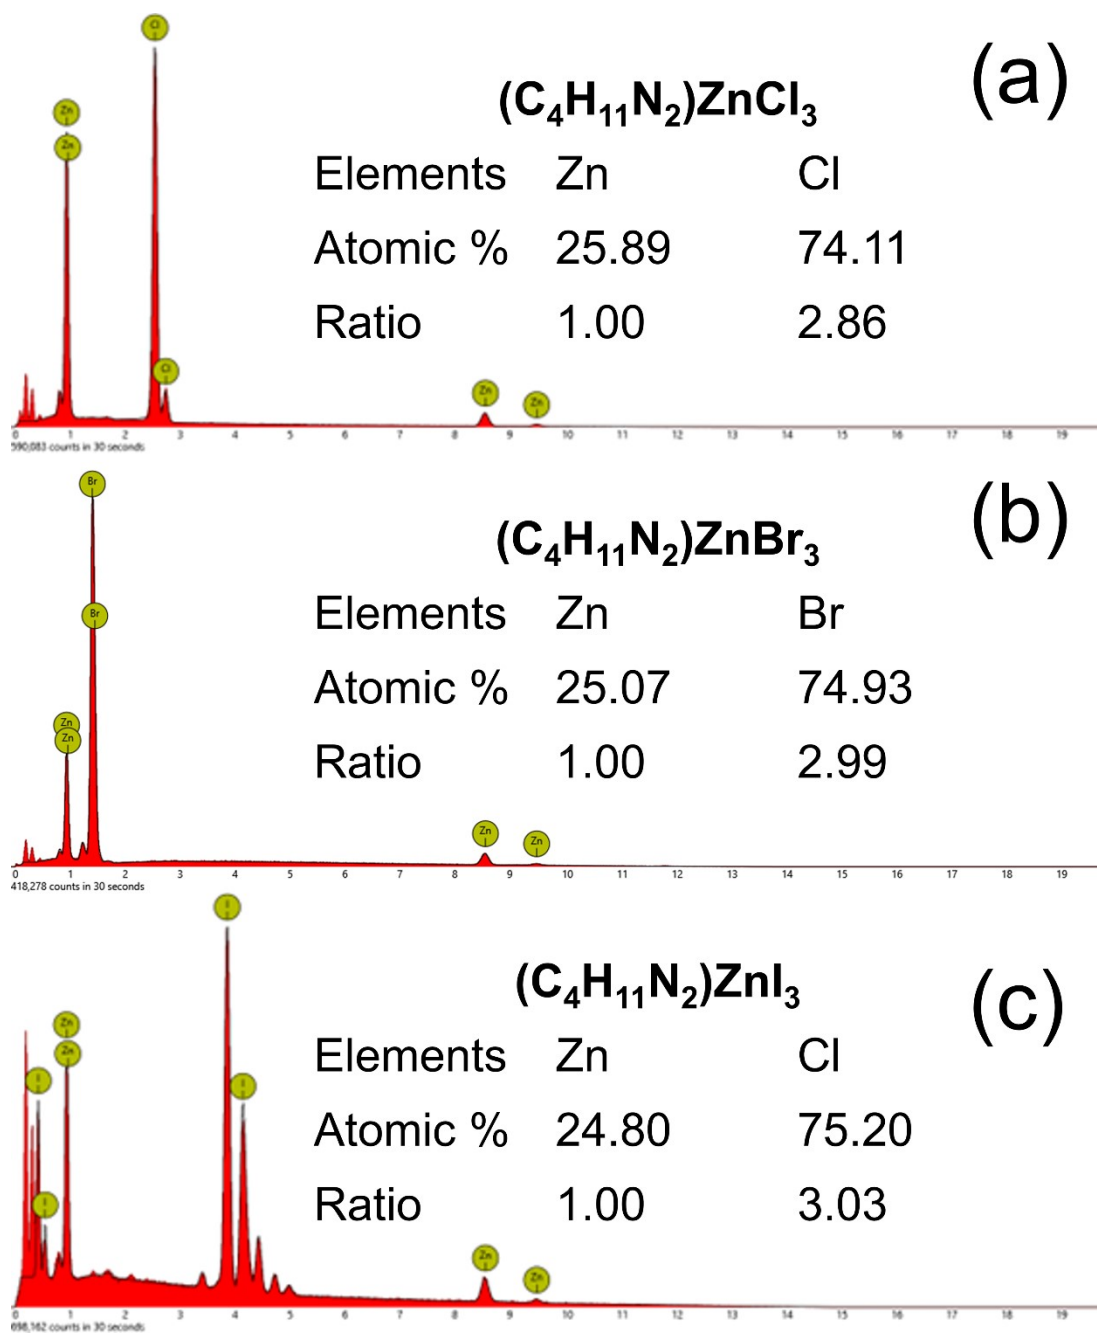

**Figure S3.** EDS for  $(C_4H_{11}N_2)ZnX_3$  ( $X = Cl$  a,  $Br$  b,  $I$  c).

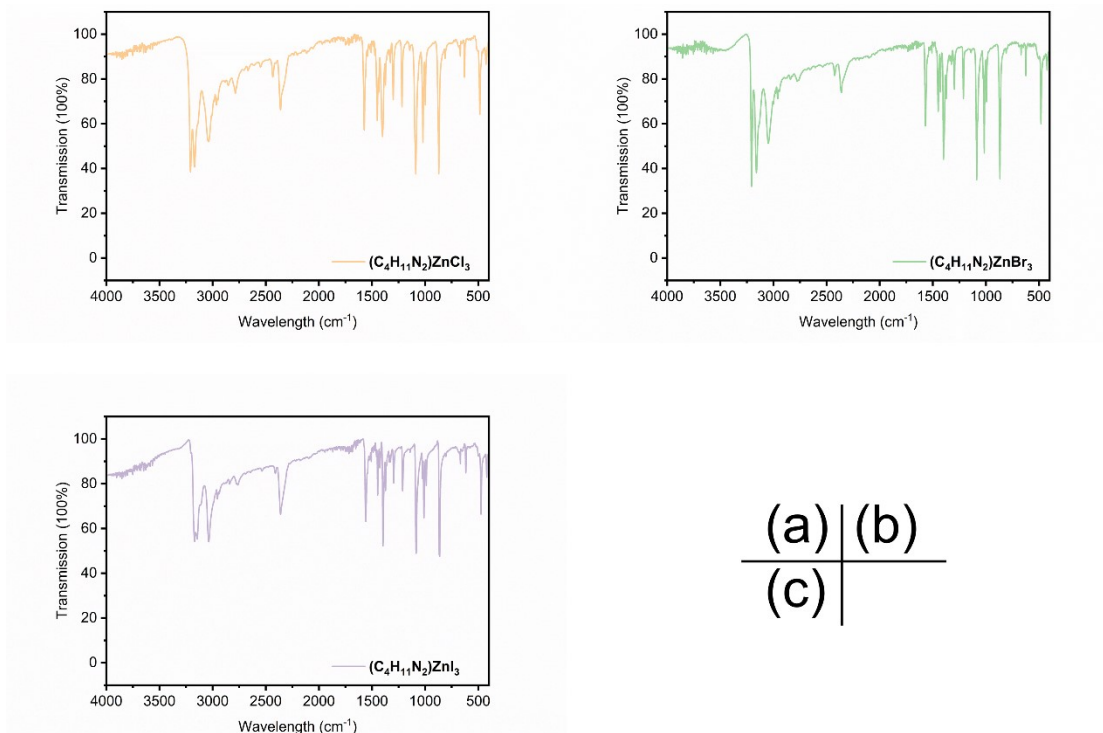

**Figure S4.** IR spectra for  $(C_4H_{11}N_2)ZnX_3$  ( $X = Cl$  a,  $Br$  b,  $I$  c).

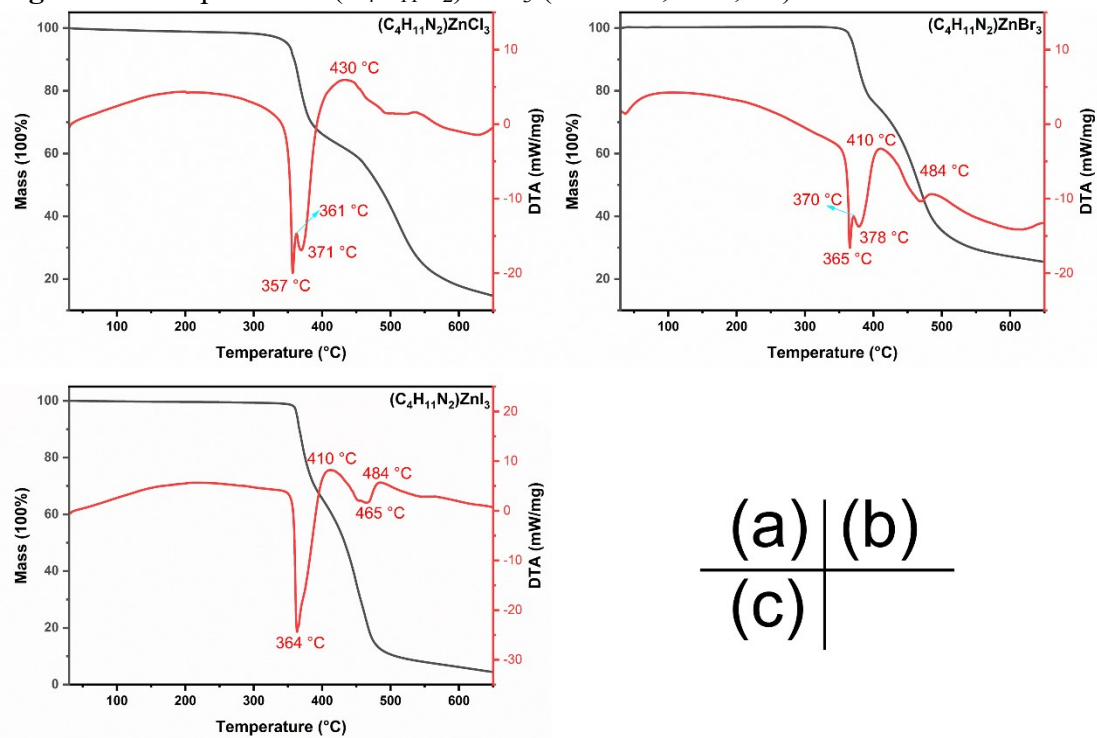

**Figure S5.** TG-DTA curves for  $(C_4H_{11}N_2)ZnX_3$  ( $X = Cl$  a,  $Br$  b,  $I$  c).

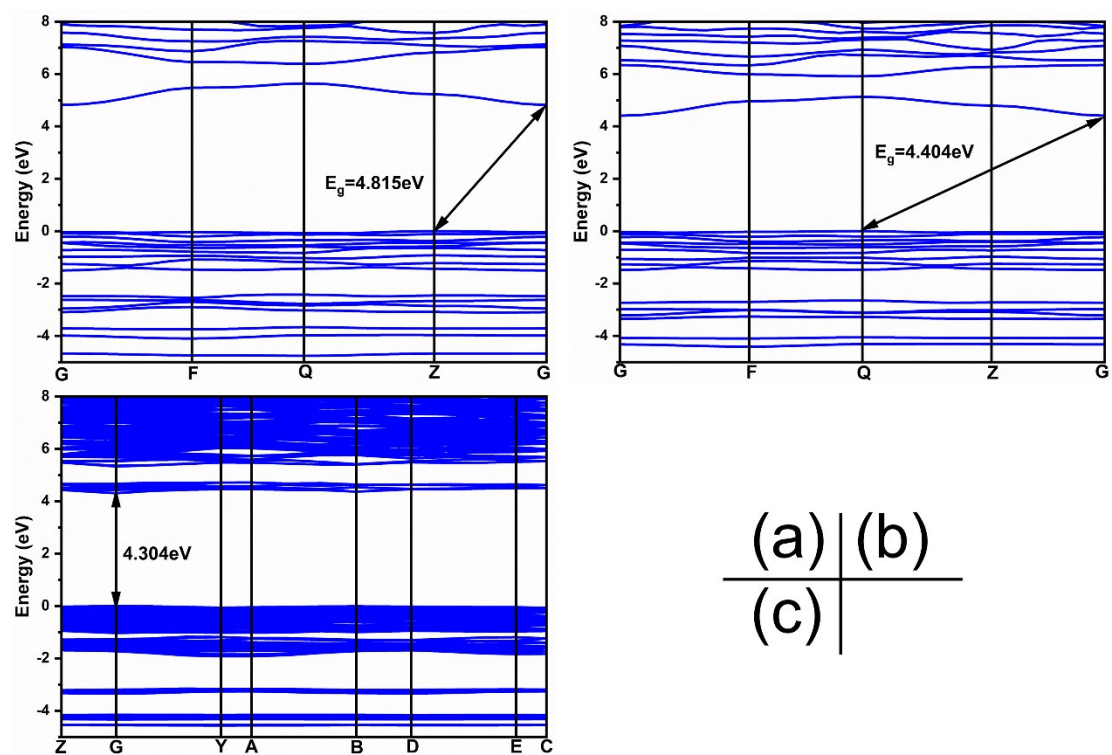

**Figure S6.** Calculated bandgaps for  $(C_4H_{11}N_2)ZnX_3$  ( $X = Cl$  a, Br b, I c).

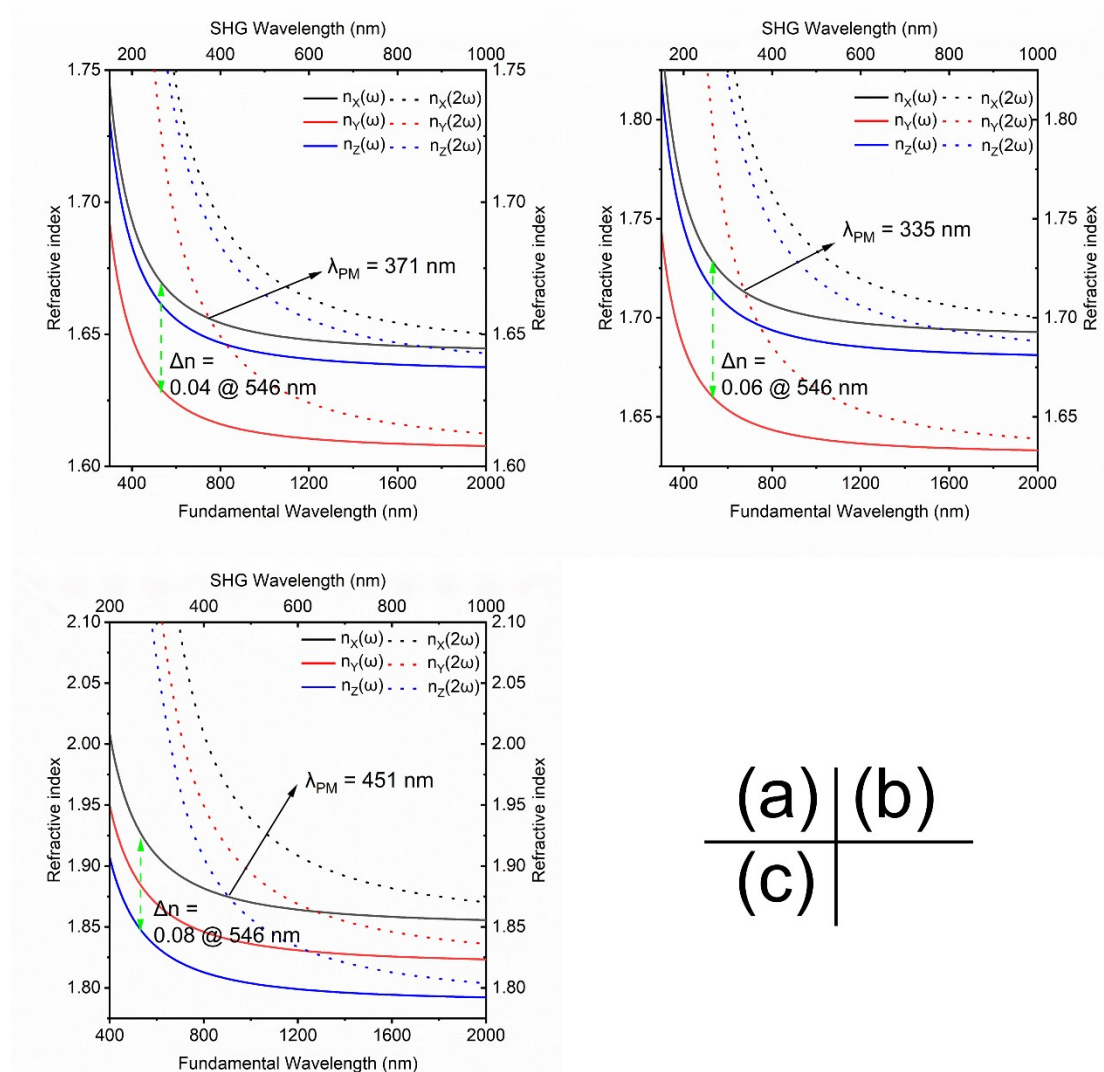

**Figure S7.** Calculated birefringence for  $(C_4H_{11}N_2)ZnX_3$  ( $X = Cl$  a,  $Br$  b,  $I$  c).
